# Supplementary material
Source: MDPI journal article supplement (https://www.mdpi.com/2075-163X/7/9/160)
Supplement: s1 [file s1]

## Supporting Information

In the calculation, there are two important parameters: cut-off energy and exchange correlation functional. Choosing the appropriate cut-off energy and exchange correlation functional is the key to making the calculated value close to the experimental value.

When the fixed cut-off energy was 300 eV, different exchange correlation functions were employed for calculation, and the results are shown in Table 1. It can be seen from Table 1 that when the cut-off energy is 300 eV, the deviation of unit cell parameters calculated under the exchange correlation functional GGA-PBESOL is minimal from the experiment values. Therefore, GGA-PBESOL is selected as the exchange correlation functional.

**Table 1.** The unit cell parameters of fluorite under different exchange correlation functional.

| Computation Function | Lattice Parameter/Å | Deviation/% |
|----------------------|---------------------|-------------|
| LDA-CA-PZ            | 5.385               | −0.0143     |
| GGA-PBE              | 5.569               | 0.0195      |
| GGA-RPBE             | 5.681               | 0.0399      |
| GGA-PW91             | 5.567               | 0.0190      |
| GGA-WC               | 5.485               | 0.0040      |
| GGA-PBESOL           | 5.481               | 0.0034      |

**Note:** the deviation representing deviations of calculated values from reference values (5.4631 Å), the same as follows.

Under exchange function GGA-PBESOL, different cut-off energies of plane wave was selected for the optimizing calculation of fluorite cell model, and the calculation results are shown in Table 2. From Table 2, when the cut-off energy reaches 330 eV, the deviation reaches the minimum value. Then with the increase of cut-off energy, the deviation is further expanded. In order to minimize the calculation deviation, the calculated cut-off energy is 330 eV.

**Table 2.** The unit cell parameters of fluorite under different cut-off energy.

| Cut-off Energy/eV | Lattice Parameter /Å | Deviation/% |
|-------------------|----------------------|-------------|
| 270               | 5.570                | 0.0195      |
| 300               | 5.482                | 0.0034      |
| 330               | 5.448                | −0.0028     |
| 370               | 5.434                | −0.0054     |
| 400               | 5.429                | −0.0063     |

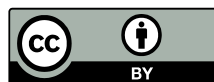

© 2017 by the authors. Licensee MDPI, Basel, Switzerland. This article is an open access article distributed under the terms and conditions of the Creative Commons Attribution (CC BY) license (<http://creativecommons.org/licenses/by/4.0/>).
